# Supplementary material for: Assessing heat exposure to extreme temperatures in urban areas using the Local Climate Zones classification
Source: Copernicus journal article supplement (doi:10.5194/nhess-2020-240), 2020-09-01
Supplement: Supplementary file 1 [file nhess-2020-240-supplement.pdf]

1 Supplementary material

2

| Built types                                                                                                        | Definition                                                                                                                                                                           | Land cover types                                                                                                  | Definition                                                                                                                                                               |
|--------------------------------------------------------------------------------------------------------------------|--------------------------------------------------------------------------------------------------------------------------------------------------------------------------------------|-------------------------------------------------------------------------------------------------------------------|--------------------------------------------------------------------------------------------------------------------------------------------------------------------------|
| <p>1. Compact high-rise</p>       | Dense mix of tall buildings to tens of stories. Few or no trees. Land cover mostly paved. Concrete, steel, stone, and glass construction materials.                                  | <p>A. Dense trees</p>           | Heavily wooded landscape of deciduous and/or evergreen trees. Land cover mostly pervious (low plants). Zone function is natural forest, tree cultivation, or urban park. |
| <p>2. Compact midrise</p>         | Dense mix of midrise buildings (3–9 stories). Few or no trees. Land cover mostly paved. Stone, brick, tile, and concrete construction materials.                                     | <p>B. Scattered trees</p>       | Lightly wooded landscape of deciduous and/or evergreen trees. Land cover mostly pervious (low plants). Zone function is natural forest, tree cultivation, or urban park. |
| <p>3. Compact low-rise</p>        | Dense mix of low-rise buildings (1–3 stories). Few or no trees. Land cover mostly paved. Stone, brick, tile, and concrete construction materials.                                    | <p>C. Bush, scrub</p>           | Open arrangement of bushes, shrubs, and short, woody trees. Land cover mostly pervious (bare soil or sand). Zone function is natural scrubland or agriculture.           |
| <p>4. Open high-rise</p>          | Open arrangement of tall buildings to tens of stories. Abundance of pervious land cover (low plants, scattered trees). Concrete, steel, stone, and glass construction materials.     | <p>D. Low plants</p>            | Featureless landscape of grass or herbaceous plants/crops. Few or no trees. Zone function is natural grassland, agriculture, or urban park.                              |
| <p>5. Open midrise</p>          | Open arrangement of midrise buildings (3–9 stories). Abundance of pervious land cover (low plants, scattered trees). Concrete, steel, stone, and glass construction materials.       | <p>E. Bare rock or paved</p>  | Featureless landscape of rock or paved cover. Few or no trees or plants. Zone function is natural desert (rock) or urban transportation.                                 |
| <p>6. Open low-rise</p>         | Open arrangement of low-rise buildings (1–3 stories). Abundance of pervious land cover (low plants, scattered trees). Wood, brick, stone, tile, and concrete construction materials. | <p>F. Bare soil or sand</p>   | Featureless landscape of soil or sand cover. Few or no trees or plants. Zone function is natural desert or agriculture.                                                  |
| <p>7. Lightweight low-rise</p>  | Dense mix of single-story buildings. Few or no trees. Land cover mostly hard-packed. Lightweight construction materials (e.g., wood, thatch, corrugated metal).                      | <p>G. Water</p>               | Large, open water bodies such as seas and lakes, or small bodies such as rivers, reservoirs, and lagoons.                                                                |
| <p>8. Large low-rise</p>        | Open arrangement of large low-rise buildings (1–3 stories). Few or no trees. Land cover mostly paved. Steel, concrete, metal, and stone construction materials.                      |                                                                                                                   |                                                                                                                                                                          |
| <p>9. Sparsely built</p>        | Sparse arrangement of small or medium-sized buildings in a natural setting. Abundance of pervious land cover (low plants, scattered trees).                                          |                                                                                                                   |                                                                                                                                                                          |
| <p>10. Heavy industry</p>       | Low-rise and midrise industrial structures (towers, tanks, stacks). Few or no trees. Land cover mostly paved or hard-packed. Metal, steel, and concrete construction materials.      |                                                                                                                   |                                                                                                                                                                          |

3

4

Figure S1. Abridged definitions for Local Climate Zones (Stewart and Oke, 2012).

5

6
