# Supplementary material for: Assessing heat exposure to extreme temperatures in urban areas using the Local Climate Zones classification
Source: Copernicus journal article supplement (doi:10.5194/nhess-2020-240), 2020-09-01
Supplement: Supplementary file [file nhess-2020-240-RC1-supplement.pdf]

# 1 **Assessing heat exposure to extreme temperatures in urban** 2 **areas using the Local Climate Zones classification**

3 Joan Gilabert<sup>1,2,3</sup>, Anna Deluca<sup>4</sup>, Dirk Lauwaet<sup>5</sup>, Joan Ballester<sup>4</sup>, Jordi Corbera<sup>2</sup>, Maria  
4 Carmen Llasat<sup>1</sup>

5  
6 <sup>1</sup>GAMA Team Department of Applied Physics - University of Barcelona,

7 <sup>2</sup>Institute Cartographic and Geological of Catalonia (ICGC),

8 <sup>3</sup>URBAG research team, Sostenipra SGR 1412 ICTA-UAB,

9 <sup>4</sup>Climate and Health Program - Barcelona Institute for Global Health, <sup>5</sup>Flemish Institute for Technological  
10 Research (VITO)

11  
12 *Correspondence to:* Joan Gilabert (jgilabert@meteo.ub.edu)

13  
14 **Abstract.** Trends of extreme temperature episodes in cities are increasing (in frequency,  
15 magnitude and duration) due to regional climate change in interaction with the urban  
16 effects. Urban morphologies and thermal properties of the materials used to build them  
17 are factors that influence the spatial and temporal climate variability and becomes one of  
18 the main reasons for the climatic singularity of cities. This paper presents a proposal to  
19 evaluate the urban and peri-urban effect on extreme temperatures exposure in Barcelona  
20 (Spain), using the Local Climate Zone (LCZ) framework as a base statement, that allows  
21 the comparison with other cities of the world characterized using this criterion. LCZs  
22 were introduced as input of the high resolution UrbClim model (100 m spatial resolution)  
23 to create the daily temperatures (median and maximum) series for summer (JJA) during  
24 the period 1987 to 2016, pixel by pixel, in order to create a cartography of extremes.  
25 Using the relationship between mortality due to high temperatures and the temperature  
26 distribution, the heat exposure of each LCZ was obtained. Methodological results of the  
27 paper show the improvement obtained when LCZs were mapped through a combination  
28 of two techniques (from Land Cover/Land Use maps and from WUDAPT method), as  
29 well as proposes a methodology to obtain the exposure to high temperatures of different  
30 LCZs on urban and peri-urban areas. In the case of Barcelona, the distribution of  
31 temperatures for the 90th percentile (about 3-4°C compared to average conditions) leads  
32 to an increase in the relative risk of mortality of 80%.

## 33 1. Introduction

34 Alterations to the natural environment associated with urban activity mean that climate  
35 variability in urban landscapes is more complex than in peri-urban and rural areas. Urban  
36 landscapes are home to more than half the world's population and projections show that  
37 two-thirds of the world's population will live in cities by 2050 (UN, 2015). Urban areas  
38 are certainly more exposed and vulnerable to the negative effects of climate change due  
39 to their non-sustainable relationship with surrounding areas and environments. The Urban  
40 Climate Change Research Network's Second Assessment Report on Climate Change in  
41 Cities (ARC 3.2) (Rosenzweig et al., 2018), places the average annual temperature  
42 increase ratio per decade between 0.12 and 0.45°C in the period from 1961 to 2010. And  
43 it is estimated that the temperature will rise between 1.3 and 3°C towards 2050 and 1.7 to  
44 4.9°C in 2080. 

45 Urban landscapes are particularly sensitive to rising temperatures at all timescales  
46 (Pachauri RK et al., 2014). Heat waves (HW) are one of the deadliest weather events  
47 and their frequency, intensity and duration are expected to increase in the future due to  
48 climate change (Li and Bou-Zeid, 2013; De Jarnett and Pittman, 2017; Sheridan and  
49 Dixon, 2016) and the urban heat island (UHI) effect. Consequently, the related health  
50 impacts are of emerging environmental health concern (Wolf and McGregor, 2013). In  
51 Europe, the growing urbanisation along with the impacts of the increasing of extreme  
52 temperature causes increased heat-related mortality (Smid et al., 2019; Ingole et al.,  
53 2020).

54 There are many factors that influence the spatial and temporal climate variability in urban  
55 areas, such as different urban morphologies and the thermal properties of the materials  
56 used to build them (Geletič et al., 2016; Li et al., 2016). One of the main topics usually  
57 studied to characterise the urban climate are the extreme temperatures in cities due to UHI  
58 effect, which was first discussed back in the 1940s (Balchin and Pye, 1947). Historically,  
59 a considerable body of research has been published on the phenomenon (i.e, Oke, 1982;  
60 Lo et al., 1997; Arnfield, 2003; Voogt and Oke, 2003; Chen et al., 2006; Mirzaei and  
61 Haghighat, 2010; Giannaros et al., 2014; Lehoczky et al., 2017; Sobrino and Irakulis,  
62 2020). However, certain methodological inconsistencies have been revealed when  
63 comparing different urban climate studies. One of the main reasons is the lack of  
64 standardisation to compare the properties that affect specific urban thermal behaviour

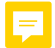

65 (Stewart, 2011). Moving forward from this premise, a new methodology based on the  
66 Local Climate Zone (LCZ) classification has emerged (Stewart and Oke, 2012). LCZ  
67 establishes a system of standardisation for urban and rural areas and their thermal  
68 responses. LCZ proposes a classification with a total of 17 measurable categories based  
69 on a combination of geometric, thermal, radiative and metabolic parameters that  
70 characterise urban and peri-urban areas (Fig. S1). By using this classification, it is  
71 possible to study the effects of urban climate in more spatial and temporal detail (Bechtel  
72 et al., 2015). The combination of built environment (Benzie et al., 2011; Inostroza et al.,  
73 2016) is well encompassed by the LCZ approach, and, along with socio-demographic  
74 factors (Nayak et al., 2018), this allows us to develop a geospatial distribution of heat  
75 exposure (Dickson et al., 2012; Drobinski et al., 2014). Along the same line of research,  
76 the international project called World Urban Database and Access Portal Tools  
77 (WUDAPT) has created a portal with guidelines based on earth observation data, with the  
78 aim of building a worldwide database of cities, using the LCZ classification. This  
79 standardisation will allow comparisons between cities, while providing better data for  
80 meteorological and climate models (Brousse et al., 2016; Ching et al., 2018). Currently,  
81 the available, validated layer for Barcelona on the WUDAPT portal is the one made in  
82 our studio to fill in the Metropolitan Area of Barcelona (AMB), as explained in more  
83 detail in section 3.1.

84 Although the LCZ was originally designed to describe the radiative characteristics of the  
85 different land covers and land uses, it can also be applied to estimate the level of heat  
86 exposure to adverse climate conditions. There are a wide range of definitions for the term  
87 ‘vulnerability’ (UNISDR, 2009; Cutter, 1996; Llasat et al., 2009), which depend on  
88 different physical and social factors (Cutter et al., 2000; Tromeur et al., 2012; Nakamura  
89 and Llasat, 2016). In this framework heat vulnerability is understood as a combination of  
90 heat exposure (based on high temperatures) and sensitivity (Wolf and McGregor, 2013;  
91 Bao et al., 2015; Inostroza et al. 2016), where the last is related with the population  
92 characteristics and coping capacities. Although there are some publications that study risk  
93 on an urban scale for extreme heat events (Xu et al., 2012; Weber et al., 2015; Krstic et  
94 al., 2017; Eum et al., 2018), few have been studied from an LCZ perspective. This paper  
95 therefore aims to assess heat exposure using the LCZ classification in a coastal  
96 Mediterranean metropolitan region. Barcelona constitutes a good example of a  
97 Mediterranean coastal megacity (port cities with a population greater than 1 million in

98 2005) (Hanson et al., 2011) that can be severely affected by climate change impacts. In  
99 effect, annual mean temperature increase in the Mediterranean Basin is higher than the  
100 world average (1.5°C above 1880-1899 in 2018) and could be above 2.2°C in 2040  
101 without additional mitigation (Lionello et al., 2014; Cramer et al., 2018; MedECC, 2019).  
102 Direct impacts on health produced by the frequency and intensity increase of heat waves  
103 and tropical nights will be amplified by the urban heat island effect, particularly important  
104 in Barcelona (Baccini et al, 2011; Martin-Vide and Moreno, 2020). Associated to this  
105 temperature increase, by 2050, for the lower sea-level rise scenarios and current  
106 adaptation measures, cities in the Mediterranean will account for half of the 20 global  
107 cities with the highest increase in average annual damages (Hallegate et al., 2013).

108 The paper is divided into two main chapters. The first deals with the study area, data and  
109 proposed methodology. The second, is focused on applying the methodology to the city  
110 of Barcelona and showing the respective results. The paper ends with a section on  
111 discussion and conclusions.

112 This study is a starting point for new research lines with three objectives in mind: a)  
113 making changes to urban land cover and observing the changes in heat exposure to high  
114 temperatures without having to resort to climate modelling; b) downscaling the  
115 temperature outputs of urban models to resolutions under 100m using the LCZ maps; c)  
116 applying this methodology to climate change scenarios.

## 117 2. Data and Methods

### 118 2.1. Study area

119 The Metropolitan Area of Barcelona (AMB) and its surroundings have been selected to  
120 apply the LCZ classification. AMB involves the city of Barcelona and 35 adjoining  
121 municipal areas (Fig. 1). The AMB is situated in the northwest of the Mediterranean basin  
122 and covers an area of 636 km<sup>2</sup> with a population of around 3,2 million. The city of  
123 Barcelona (~1,6 million) is in its centre, between the Llobregat River (South), the Besòs  
124 River (North), the Catalan Coastal Range (West) and the Mediterranean Sea (East) (Fig.  
125 1b).

126 The Barcelona municipality has been selected to analyse the effect of high temperatures  
127 and apply the proposed methodology approach on a neighbourhood scale. Barcelona is

128 divided into 10 districts, which are subdivided into 73 neighbourhoods. It covers an area  
129 of 101 km<sup>2</sup> and has a population density of over 15,000 inh./km<sup>2</sup>, which is higher than  
130 New York City, Tokyo or New Delhi. In terms of climate, Barcelona and its surroundings  
131 are characterised by hot summers (25°C-27°C average temperature), and the thermal  
132 stress of high temperatures is accentuated by the proximity of the sea, which results in a  
133 humid atmosphere. Total precipitation in Barcelona is around 600 mm per year. Autumn  
134 is the wettest season and has a highly irregular distribution of precipitation, in many cases  
135 causing episodes of urban flooding (Gilabert and Llasat, 2017; Cortès et al., 2018).

136

## 137 **2.2 Methodology design**

138 In order to carry out this study, we followed the workflow shown below:

- 139 1. LCZ Mapping: A GIS methodology based on Land Cover and Land Use (LCLU)  
140 maps has been applied to the entire AMB to improve the precision of the  
141 international WUDAPT method. The WUDAPT method has been also applied to  
142 all the area showed in Figure 1b, both inside and outside AMB, that will be used  
143 as input of the climate model.
- 144 2. Climate characterisation of the median and extreme temperature distribution in  
145 Barcelona from the outputs of UrbClim model.
- 146 3. Defining the heat exposure thresholds based on the epidemiological temperature-  
147 mortality model proposed by Achebak et al. (2018).
- 148 4. Developing a methodology for the thermal characterisation of the LCZs and its  
149 assessment.

150 Each one of these steps will be explained in detail in the following sections in order to  
151 simplify the understanding of this methodology in which each part is based in the results  
152 of the previous one. The own methodology followed constitutes a result of this work.

## 153 **2.3. LCZ mapping**

### 154 **2.3.1 Data from official thematic cartography, satellite images and weather stations**

155 In order to create the LCZ cartography data showed in Table 1 have been used. The LCZs  
156 were represented following two methods, as explained in section 3. The Land Cover Land  
157 Use method was based on using all the layers presented in Table 1, except for the Landsat  
158 8 image, which was only used with the WUDAPT methodology and the orthophoto to  
159 make the training areas.

### 160 **2.3.2 Land Cover and Land Use method and WUDAPT method**

161 There are several proposals for mapping LCZs, whether from a bottom up or top down  
162 approach (Brousse et al., 2016; Lelovics et al., 2014; Wang et al., 2017; Mitraka et al.,  
163 2015). Each LCZ is defined by 10 variables (geometric, radiative and metabolic), which  
164 were tested and standardised by Stewart and Oke (2012) and are applied in this study.

165 Our study features a LCZ map that combines two different mapping techniques (Fig. 2).  
166 For the administrative region of the AMB (with a more extensive and detailed source of  
167 data), a methodology based on LCLU data was used that departs from the reclassification  
168 of the land use key for the existing high-resolution maps. The LCLU data were combined  
169 with LIDAR data, which allowed us to define the height of the buildings. There are other  
170 techniques that use similar methodologies to show LCZs, like those by Geletič and  
171 Lehnert (2016) or Skarbit et al. (2017). For the area outside the AMB, the international  
172 WUDAPT methodology was used, based on satellite earth observation data (Bechtel et  
173 al, 2015). This study improved accuracy through a population map and high resolution  
174 orthophotos provided by the Cartographic and Geological Institute of Catalonia (ICGC).  
175 Both methodologies are summarized below.

176 The LCLU method is based on different Land Cover and Land Use maps (see Table 1),  
177 such as the Land Cover Map of Catalonia (LCLU-Cat), which uses an extensive  
178 classification of up to 241 categories (CREAF, 2010), and the Urban Atlas (UA) (EEA,  
179 2010). The first thematic map was used to define the Land Cover Types and density of  
180 vegetation. The UA distinguishes 20 categories of urban areas and discerns between urban  
181 fabric type and density, which is why it is very useful for the first 10 categories of LCZ.  
182 Each LCLU category corresponds to one of the descriptions of the different  
183 morphological parameters that define the LCZ. The Building Heights is another layer of  
184 the map, and was made with a LIDAR sensor, which was also used to discern between  
185 the different Urban Climate Zones.

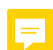

186 Figure 3 shows the difference between the total coverage of each LCZ when obtained  
187 from the LCLU and from WUDAPT maps in AMB (Fig. 2). In the WUDAPT approach,  
188 52.8% of the surface area of the AMB consists of urban areas (LCZ 1-10 and E), while  
189 in the high-resolution map (LCLU approach), the same type of coverage occupies just  
190 37.3% due to the different resolution of both methodologies. In both methods, we can  
191 see that the natural forest category (LCZ-A) is the most common, accounting for 24.1%  
192 and 18.4% of the land respectively. This is due to the fact that the AMB includes  
193 Collserola Natural Park in the Coastal Mountain Range. The next most common class is  
194 LCZ-C, which corresponds to scrubland and bush. Dealing with land classified as urban,  
195 the most common types include industrial estates (LCZ-8), areas with dense buildings  
196 less than 25 m tall (LCZ-2) and category LCZ-6, which consists of open arrangements of  
197 mid-rise buildings. The WUDAPT map suffers from a lack of characterisation of urban  
198 areas, which is not the case for the LCLU map.

199 The resulting LCZ map is a high resolution thematic/vector map/base map (Figure 2b),  
200 in which each polygon that makes up the urban fabric is attributed to an LCZ category  
201 (Gilabert et al., 2016). Finally, it was rasterised at a resolution of 100 m, applying an all  
202 shape filter, so that it could be used as an input for the UrbClim model. The method we  
203 followed is shown in the workflow diagram (Figure 4). There are similar examples in the  
204 literature, such as the LCZ map for the Île-de-France ([www.institutparisregion.fr](http://www.institutparisregion.fr)), or the  
205 LCZ-LCLU Map of Vienna (Hammerberg et al., 2018).

206 The WUDAPT method (Bechetel et al., 2015) allows us to create a 100 m x 100 m raster  
207 map based on earth observation data from remote sensing. The representative regions of  
208 interest are chosen for proposed LCZ categories from earth observation satellite data, with  
209 the use of very high resolution aerial orthophotos as a ground truth. The LCZ map, made  
210 by the first author of this paper, using the WUDAPT proposal, is officially presented on  
211 the project portal and is available for download ([www.wudapt.org](http://www.wudapt.org)). This method has been  
212 applied to an extended area as is showed at Figure 5.

213 A multi-resolution grid shape file (62.5 m, 125 m and 250 m) containing information on  
214 the population as registered in 2016 (IDESCAT, 2018) was used to correct the peri-urban  
215 areas of AMB where rural activities cannot see well identified. The orthophoto was used  
216 to check and correct any categories and the limits between them.

217 Figure 5 shows the resulting map combining the LCLU method (in raster format) for the  
218 administrative region of the AMB, and WUDAPT method for the rest of the study area  
219 with a final resolution of 100m.

## 220 **2.4 Weather stations**

221 Table 2 shows the weather stations within the municipality of Barcelona that have been  
222 used to evaluate and compare the characterization of the LCZ with the daily average  
223 temperature outputs of the UrbClim model. LCZ and height information are also attached.

## 224 **2.5 UrbClim model simulation**

225 UrbClim is an Urban Boundary-Layer Climate Model specifically designed to simulate  
226 temperature at a very high spatial resolution (here at 100 m; De Ridder et al., 2015). The  
227 model consists of a land surface scheme with simplified urban physics coupled to a 3D  
228 atmospheric boundary layer. UrbClim is faster than high-resolution mesoscale climate  
229 models by at least two orders of magnitude (García-Díez et al., 2016), making the very  
230 long runs that are necessary for climate change related studies possible. UrbClim has been  
231 recently validated in several European cities, including Barcelona (García-Díez et al.,  
232 2016). Currently, within the framework of the Pan-European Urban Climate Service  
233 (PUCS) project (H2020, 2017-2010), the urban climate of Barcelona has been modelled  
234 until 2100, keeping in mind different Representative Concentration Pathways (RCPs) to  
235 observe the consequences of climate change on an urban scale. Barcelona was chosen,  
236 among other European cities, and VITO and ISGlobal were the organisations responsible  
237 for modelling this city.

238 UrbClim model uses a land-surface and a soil-vegetation-atmosphere transfer scheme that  
239 is designed to deal with urban surfaces. Each surface grid cell in the model is made up of  
240 portions of vegetation, bare soil and urban surface cover, which are all represented using  
241 LCZ mapping. A set of transfer equations, together with appropriate parameter values for  
242 albedo, emissivity, aerodynamic and thermal roughness length are used to simulate the  
243 heat transfer in each surface grid cell. The large-scale atmospheric conditions are used as  
244 lateral and upper boundary conditions. The 3D boundary layer model represents a  
245 simplified atmosphere by using the continuity equations for horizontal momentum,  
246 potential temperature, specific humidity and mass.



247 The simulations for the 1987-2016 period were used for this period. The UrbClim  
 248 simulations cover a large domain containing 401x401 horizontal grid points at 100 m  
 249 resolution (40x40 km approximately), and 19 vertical levels within the lower 3 km of the  
 250 troposphere. It covers the entire geographical area of the Metropolitan Area of Barcelona,  
 251 including the neighbouring highly populated cities. The driving model data are updated  
 252 every 3 hours using ERA-Interim reanalysis (Dee et al., 2011), which runs at a spatial  
 253 resolution of T255 (approximately 70-80 km). The UrbClim model directly downscales  
 254 the ERA-Interim reanalysis data to 100 m resolution. The climate distribution of the daily  
 255 mean temperature ( $T_{mean}$ ), maximum temperature and dew point temperatures were  
 256 calculated for all the summer months (JJA). The dew point temperature ( $T_{dew}$ ) was used  
 257 as a starting point to calculate the HUMIDEX Eq. (1) that describes the perceived thermal  
 258 feeling of a person, by combining the effect of heat and humidity (Masterton and  
 259 Richardson, 1979). Barcelona has quite a high relative humidity during the summer  
 260 months, which means that the HUMIDEX increases considerably.

$$261 \quad HUMIDEX = T_{mean} + 0.5555 \left[ 6.11e^{5417.7530 \left( \frac{1}{273.16} + \frac{1}{273.15 + T_{dew}} \right)} - 10 \right] \text{ Eq. (1)}$$

## 262 **2.6 Quantifying heat exposure by temperature**

263 The next step consists of reclassifying the maps of the proposed distributions for the daily  
 264 mean temperature, keeping in mind the impact that they can have on the health. This was  
 265 carried out using the results provided in the study by Achebak et al. (2018), in which a  
 266 distributed lag nonlinear model was used to model the short-term delayed relation  
 267 between daily summer temperature and mortality data from cardio-respiratory diseases in  
 268 Barcelona (and 46 other cities), over a similar period of time modelled (Fig. 6). This  
 269 makes it possible to objectively establish the thresholds for health relative risks (RR),  
 270 based on temperature. For instance, a RR value of 1.20 means that the relative risk of  
 271 mortality is 20% higher at a given level of temperature exposure compared to a baseline  
 272 optimum temperature (e.g. temperature of minimum mortality, when RR=1). Relative  
 273 risks are statistically significant when the lower bound of the CI is greater than 1.

274 We are assuming that the curve is applicable to all districts of the city (Achebak et al.,  
 275 2018). Table 3 has been built for RR intervals of 0.2 (20%) following the Figure 6. Each  
 276 RR interval has been associated to a Heat Exposure Index (HEI) that includes temperature

277 interval based on the curve of Achebak et al. (2018). Barcelona deals with HEI value of  
278 1 for temperatures between 18 and 20°C up to a HEI value of 7, for temperatures above  
279 31.1°C that would mean a very high relative risk of mortality associated with high  
280 temperatures.

### 281 **3. Results**

#### 282 **3.1 UrbClim temperature outputs and HEI maps**

283 In order to analyse the impact of the different LCZ in the distribution of high temperatures  
284 in summer the maps of maximum and daily mean temperature corresponding to  
285 percentiles P50, P75, P90, P95 and P99 have been built (Fig. 7). Barcelona has a high  
286 relative humidity due to proximity to the sea that increases the warm perception, and, for  
287 this reason, the cartography of the average daily HUMIDEX value has also been  
288 represented.

289 As we can see in figure 7, there is a very similar spatial distribution pattern. The lowest  
290 temperatures are in the most remote area of the coast and they are mainly associated with  
291 categories LCZ A and LCZ 9 (mainly covering areas of woodland or very low-density  
292 buildings). A cooling effect can also be noted in the most important parks in the city, as  
293 well as on the seafront, because of the sea breeze (the UrbClim model underestimates the  
294 sea breeze effect in Barcelona, García-Diez et al., 2016). The highest temperatures can be  
295 found in the centre of the city, with a tendency to increase in a north-easterly direction.

296 We saw that P99 of HUMIDEX reached 39°C. In Barcelona, without taking humidity into  
297 account, the average temperature in the city can reach above 30°C. Even so, normal  
298 temperatures during the summer are around 27°C. In Mediterranean cities, relative  
299 humidity is important since it is usually high, a fact that affects temperature (Diffenbaugh  
300 et al., 2007). In this sense, we observe that the HUMIDEX can register temperatures of  
301 the order of 5°C higher than the sensible temperature. Anyway, this study has focused on  
302 sensible temperature because the curve that defines the HEI has been made for sensible  
303 temperature. In any case, we must bear in mind that the temperature or heat stress may be  
304 higher due to the greater HUMIDEX.

305 Figure 8 shows maps of HEI distribution reclassified the UrbClim output of daily mean  
306 temperature according to the proposed thresholds showed in section 2.6. This

307 reclassification turns the extreme temperature maps or hazard maps into heat exposure  
308 maps. It can be seen that the HEI is lower in areas with higher altitude and in inter-urban  
309 parks (as the Montjuïc Park located in SE of the map), although when P90 is surpassed,  
310 the HEI value goes over level 5 for most of the urban fabric. Note that the P50 shows an  
311 increase in the relative risk of mortality of 40%.

### 312 **3.2 Thermal characterisation of the LCZs**

313 In this section we aim to match up each LCZ with a determined thermal behaviour to  
314 create a methodology that will allow us to estimate the heat exposure to high temperatures  
315 from this data.

316 First, we analysed the thermal response of the LCZ (LCZ-T) to the high temperature  
317 situations obtained in the climate analysis (Fig. 7). Second, we analysed the probability  
318 density curves for each LCZ, so that we could calculate the anisotropy levels of the LCZs.  
319 Using this foundation, we built curves for the LCZs and a defined scenario for the  
320 percentiles considering the HEI, which allowed us to create a model that was applicable  
321 not only to Barcelona but also to other regions with similar behaviour. Transposing the  
322 model on LCZ maps allows us to map heat exposure distributions for Barcelona.

323 Figure 9 shows that LCZ 8, 1, E and 2 (from highest to lowest), have usually the highest  
324 temperatures. These LCZ in general terms correspond to the categories with high  
325 admittance and high permeability (Stewart and Oke, 2012). In contrast, the lowest  
326 temperatures correspond to LCZ 9, A, C and G, which are wooded areas and parks on the  
327 outskirts of the city. On the other hand, crops and bare land (LCZ C and F) show very  
328 variable behaviour, as during the day they tend to be surfaces that store and retain heat,  
329 while during the night their behaviour registers temperatures under the average of the  
330 sample. These surfaces are characterised by a large temperature range given the marked  
331 contrast between day and night.

332 Table 4 shows that the more extreme the percentile the larger the standard deviation, as  
333 expected. Besides this, the more marked deviations correspond to LCZ C and F, which  
334 correspond to wooded or bare areas and which show less thermal inertia. On the other  
335 hand, category C is very highly influenced (in the case of Barcelona) by orientation, as  
336 there are zones located in shaded parts of valleys while other zones are in the sunny ones,

337 which has a direct impact on the deviation. In the case of category C, we observed that it  
338 corresponds to a land use that is not very representative in spatial terms.

### 339 **3.3 Mapping the heat exposure with LCZs**

340 Figure 10 shows the average behaviour of the LCZs for different temperature percentiles  
341 (P50, P75, P90, P95, P99). The values corresponding to range between the 25th and 75th  
342 percentiles of each LCZ for each probability scenario have been adjusted to a logarithmic  
343 curve that can be very useful to build heat exposure maps for high temperatures based on  
344 the thermal properties of the LCZ. Knowing the temperature distribution for each  
345 category and scenario allows doing the simulation of the impact on temperature  
346 distribution of potential modifications to the urban morphology.

347 As explained in the methodology, seven ranges of temperature have been defined  
348 according to different relative risk thresholds (Table 3) established by the curve proposed  
349 in the study by Achebak et al. (2018) (Fig. 6). By characterising the LCZ from the model  
350 represented in Figure 11, the maps of the heat exposure index (HEI) associated to high  
351 temperatures for different probabilistic scenarios have been built. The scenario  
352 corresponding to the P75 of the temperature would imply a ratio of relative risk of  
353 mortality increase of 60%, and, 80% in a scenario according to the P90.

### 354 **3.4 Assessment and comparison of the LCZ-T relationship**

355 The results of the LCZ-T relationship as well as the results of the Urban Climate model  
356 (UC) have been compared with the distribution of temperature obtained from series of  
357 over 10 years for five weather stations (Table 2) located in different LCZ in the  
358 municipality of Barcelona. RMSE and the differences between the output of both  
359 (UrbClim model and LCZ-T relationship) and observations have been obtained in order  
360 to compare the results (Tables 5 and 6). We want to highlight that the UrbClim has been  
361 already validated in Barcelona by García-Díez et al. (2016) as outlined in section 2.6.  
362 Table 5 shows that differences in absolute value are lower than 1.2°C. In all the cases they  
363 are equal or below 0.5 °C for the percentile of 50, and also for the percentile of 75 with  
364 the exception of the Raval station, that is placed in the oldest part of the city. It should  
365 also be kept in mind that a standalone observation is not the same as an aerial 100 x 100

366 m observation, and this fact is particularly important when the weather station is  
367 surrounded by buildings.

368 The HEI maps drawn up using the LCZs were compared with the map based on  
369 temperature distributed created by UrbClim (Table 6). Coincidences between pixels for  
370 both models are above 80% for percentiles P50, P75 and P90, and more than 60% in all  
371 cases.

372

#### 373 **4. Discussion and conclusions**

374 Along this paper a methodology to characterize the distribution of daily mean temperature  
375 for the different LCZs in different scenarios has been proposed. This characterization has  
376 been done for the summer months and climate percentiles have been obtained for the  
377 period 1987-2016 and applied at 100 m resolution to the city of Barcelona. Although  
378 other authors have already worked with the relationship between thermal behaviour and  
379 LCZ category (Stewart et al., 2014; Skarbit and Gal., 2015; Geletič et al., 2016; Verdonck  
380 et al., 2018) they have usually applied Land Surface Temperature satellite images, for the  
381 summer months and a short time period. Other characterizations of LCZ using weather  
382 stations can also be found in Alexander and Mills (2014) and Kotharjar and Bagade  
383 (2018). In this case, these authors have worked with climate series from observational  
384 data. The advantage of the methodology proposed here, in which the LCZ distribution  
385 has been compared with the outputs of a high-resolution climate model (UrbClim) is that  
386 the relationship has been established from long climate series and for the entire selected  
387 region. Currently, there are quite a few studies characterizing LCZs using urban model  
388 outputs (Aminipouri et al., 2019; Beck et al., 2018; Geletič et al., 2018; Kwok et al., 2019;  
389 Unger et al., 2018), but there are few that do it with climatic outings that span so many  
390 years.

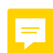

391 The results of this methodology applied to the Metropolitan Area of Barcelona have  
392 showed a major difference between the thermal response in summer for the different LCZ  
393 that this obtained from some satellite images. In terms of land use, LCZ A and C, that  
394 belong to the most prevalent categories, show the lowest temperatures, consistent with  
395 the majority of studies carried out (e.g. Geletič et al., 2016). In our case, category C

396 shows a wider interquartile range than the other types. This is because this category is  
397 found in different altitudes along the Catalan Coastal Range and in areas with different  
398 orientations. Regarding category B, attributed to the majority of interurban parks, it  
399 maintains temperatures below those of the most typical urban zones.

400 The highest daily mean summer temperatures in Barcelona are concentrated in LCZ 2, E,  
401 1, 8 F and 10, with LCZs 2, 1 and E being the most representative of the urban planning  
402 in the city centre. With regard to LCZ 8 and 10, these are zones that tend to record high  
403 temperatures due to the nature of the activities and materials on the land cover (in the  
404 most cases, metal structures). The urban LCZ with the lowest temperatures is 9, which is  
405 almost non-existent in Barcelona and is located mainly in zones in the Catalan Coastal  
406 Range with a significant altitudinal slope. Another urban LCZ with low relative  
407 temperatures commonly found in the city is 6, which is mainly located in the  
408 neighbourhoods furthest away from the coast and closer to the mountain. These  
409 neighbourhoods have a higher percentage of urban green cover, less dense buildings and  
410 one of the highest per capita GDPs in the city.

411 The paper has also introduced the Heat Exposure Index (HEI), that evaluates the increase  
412 of the risk of mortality ratio as a consequence of heat exposure in basis to the model  
413 proposed by Achebak et al. (2018) which connects relative risk of mortality caused by  
414 cardio-respiratory failure with the effects of high temperatures. This index, associated to  
415 each LCZ once the temperature has been associated to it, allows mapping the HEI. The  
416 comparison between the HEI maps elaborated directly from the temperature outputs  
417 produced by the UrbClim model and those produced from LCZ cartography is well-suited  
418 to simulate them for scenarios corresponding to percentiles of temperature between 50%  
419 and 90%, and, in the case in which there is no coincidence between the HEI value in the  
420 pixel, it is more usual underestimation than overestimation. In the case of Barcelona, the  
421 distribution of temperatures for the P90 (about 3-4°C compared to average conditions)  
422 leads to an increase in the relative risk of mortality of 80%, and 40% in the case of P50.

423 This paper also provides comparison of two methodologies to cartography the Local  
424 Climate Zones (LCZ). The study area has been mapped using two techniques, the LCLU  
425 based on land use maps and the WUDAPT. The LCLU has been applied to the  
426 Metropolitan Area of Barcelona and the WUDAPT to the entire region (inside and  
427 outside) the AMB. The WUDAPT map suffers from a lack of characterisation of different

428 types of urban areas, which is not the case for the LCLU. Then, when the required data is  
429 available it is better to apply the LCLU methodology than the WUDAPT one. In this  
430 study, the curve of Achebak et al. (2018) was taken into account, as representative of the  
431 whole of Barcelona city. In the future, it would be good to have a similar curve for  
432 different districts of the city. However, in future work it would be interesting to represent  
433 a sensitivity map taking into account coping capacities based on GDP, social structure of  
434 the neighbourhood, etcetera. This would include vulnerability.

435 In conclusion, the LCZ-T relation based on the characterisation of the average  
436 temperature for each LCZ corresponding to different percentile distribution, allows us to  
437 consider adaptive methods, proposing changes to more sustainable urban planning, for  
438 example the use of green or white cover. The advantage of the proposed methodology is  
439 that it allows to obtain a heat exposure distribution for summer temperatures without  
440 having to resort climate models, by applying the model of temperature distribution  
441 associated to each LCZ. It can be also useful to do different experiments modifying land  
442 uses and land coverages over the cartography, and, consequently, the LCZ distribution  
443 and their associated HEI. Another possibility is being able to separate the heat exposure  
444 levels on an LCZ map with higher spatial resolutions to those used in weather models and  
445 climate models.

#### 446 **Acknowledgements**

447 This publication was supported by the Industrial Doctorate Programme (ref. 2015-DI-  
448 038) between the University of Barcelona and the Cartographic and Geological Institute  
449 of Catalonia, the Water Research Institute (IdRA) at the University of Barcelona, M-  
450 CostAdapt (CTM2017-83655-C2-2-R) research projects (MINECO/AEI/FEDER, UE)  
451 and ERC Consolidator Grant awarded to Gara Villalba (818002-URBAG). The authors  
452 would like to thank the European Environment Agency (EEA), Centre for Ecological  
453 Research and Forestry Applications (CREAF) and Metropolitan Area of Barcelona for  
454 the land use maps available. We would also like to thank the State Meteorological Agency  
455 (AEMET) and the Meteorological Service of Catalonia (SMC) for the weather station  
456 data. Finally, we want to thank Hicham for giving us the RR model.

457 JB gratefully acknowledges funding from the European Union's Horizon 2020 research  
458 and innovation programme under grant agreements No 865564 (European Research

459 Council Consolidator Grant EARLY-ADAPT), 727852 (project Blue-Action) and  
460 730004 (project PUCS), and from the Ministry of Science and Innovation (MCIU) under  
461 grant agreements No RYC2018-025446-I (programme Ramón y Cajal) and EUR2019-  
462 103822 (project EURO-ADAPT).

#### 463 **Author contributions**

464 JG conceived the study, designed and carried out the data analysis and wrote the paper.  
465 MCL, JC and JB have participated in defining the analysis and methodology, contributed  
466 to interpreting the results, and to writing the paper. DL and AdL have run the UrbClim  
467 model and prepare the output data.

#### 468 **Competing interests**

469 The authors declare that they have no conflict of interest.

#### 470 **References**

471 Achebak, H., Devolder, D., and Ballester, J.: Heat-related mortality trends under recent  
472 climate warming in Spain: A 36-year observational study. *PLoS med.* 15(7): e1002617,  
473 2018.

474 Alexander, P., and Mills, G.: Local climate classification and Dublin's urban heat  
475 island. *Atmosphere.* 5(4): 755-774, 2014.

476 Aminipouri, M., Knudby, A. J., Krayenhoff, E. S., Zickfeld, K. and Middel, A.:  
477 Modelling the impact of increased street tree cover on mean radiant temperature across  
478 Vancouver's local climate zones. *Urban Forestry & Urban Greening*, 39, 9–17, 2019.

479 Arnfield, A. J.: Two decades of urban climate research: a review of turbulence, exchanges  
480 of energy and water, and the urban heat island. *Int. J. Climatol.* 23(1): 1-26, 2003.

481 Baccini, M., Kosatsky, T., Analitis, A., Anderson, H.R., D'Ovidio, M., Menne, B.,  
482 Michelozzi, P., Biggeri, A.: Impact of heat on mortality in 15 European cities: attributable  
483 deaths under different weather scenarios. *J Epidemiol Commun H*, 65, 64-70, 2011.



484 Balchin, W. G. V., and Pye, N.: A micro-climatological investigation of bath and the  
485 surrounding district. *Q. J. Royal Meteorol. Soc.* 73(317-318): 297-323, 1947.

486 Bao, J., Li, X. and Yu, C.: The construction and validation of the heat vulnerability index,  
487 a review. *Int. J. Environ. Res. Public Health.* 12(7): 7220-7234, 2015.

488 Beck, C., Straub, A., Breitner, S., Cyrus, J., Philipp, A., Rathmann, J., Schneider, A.,  
489 Wolf, K. and Jacobeit, J.: Air temperature characteristics of local climate zones in the  
490 Augsburg urban area (Bavaria, southern Germany) under varying synoptic conditions.  
491 *Urban Climate*, 25, 152–166, 2018.

492 Bechtel, B., Alexander, P. J., Böhner, J., Ching, J., Conrad, O., Feddema, J., Mills, G.,  
493 See, L., and Stewart I.: Mapping local climate zones for a worldwide database of the form  
494 and function of cities. *ISPRS Int. J. Geo-Inf.* 4(1): 199-219, 2015.

495 Benzie, M., Harvey, A., Burningham, K., Hodgson, N., and Siddiqi, A.: Vulnerability to  
496 heatwaves and drought: Case studies of adaptation to climate change in South-west  
497 England. Joseph Rountree Foundations, 2011.

498 Brousse, O., Martilli, A., Foley, M., Mills, G., and Bechtel B.: WUDAPT, an efficient  
499 land use producing data tool for mesoscale models? Integration of urban LCZ in WRF  
500 over Madrid. *Urban Clim.* 17: 116-134, 2016.

501 Chen X. L., Zhao H. M., Li P. X., and Yin Z. Y.: Remote sensing image-based analysis  
502 of the relationship between urban heat island and land use/cover changes. *Remote Sens.*  
503 *Environ.* 104(2): 133-146, 2006.

504 Ching, J., Mills, G., Bechtel, B., See, L., Feddema, J., Wang, X., Ren, C., Brousse, O.,  
505 Martilli, A., Neophytou, M., Mouzoudires, P., Stewart, I., Hanna, A., Ng, E., Foley, M.,  
506 Alexander, P., Aliaga, D., Niyogi, D., Shreevastava, A., Bhalachandran, S., Masson, V.,  
507 Hidalgo, J., Fung, J., de Fatima Andrad, M., Baklanov, A., Wei Dai, D., Milcinski, G.,  
508 Demuzere, M., Brunsell, N., Pesaresi, M., Miao, S., Mu, Q., Chen, F., and Theeuwes, N.:  
509 World urban data base and access portal tools (WUDAPT), an urban weather, climate and  
510 environmental modelling infrastructure for the Anthropocene. *Bull. Am. Meteorol. Soc.*  
511 99(9): 1907-1924, 2018.

512 Cortès, M., Llasat, M. C., Gilabert, J., Llasat-Botija, M., Turco, M., Marcos, R., Martin  
513 Vide, J. P., and Falcón L.: Towards a better understanding of the evolution of the flood  
514 risk in Mediterranean urban areas: the case of Barcelona. *Nat. Hazards*. 93(1): 39-60,  
515 2018.

516 Cutter, S. L.: Vulnerability to environmental hazards. *Prog. Hum. Geogr.* 20(4): 529-539,  
517 1996.

518 Cutter, S.L., Mitchell, J. T., and Scott, M. S.: Revealing the vulnerability of people and  
519 places: a case study of Georgetown County, South Carolina. *Ann. Am. Assoc.*  
520 *Geogr.* 90(4): 713-737, 2000.

521 Cramer, W., Guiot, J., Fader, M., Garrabou, J., Gattuso, J. P., Iglesias, A., Lange, M. A.,  
522 Lionello, P., Llasat, M. C., Paz, S., Peñuelas, J., Snoussi, M., Toreti, A., Tsimplis, M. N.,  
523 and Xoplaki, E.: Climate change and interconnected risks to sustainable development in  
524 the Mediterranean. *Nat. Clim. Change* 8:972-980, doi: 10.1038/s41558-018-0299-2,  
525 2018.

526 Dee, D. P., Uppala, S. M., Simmons, A. J., Berrisford, P., Poli, P., Kobayashi, S., Andrae,  
527 U., Balmaseda, M. A., Balsamo, G., Bauer, P., Bechtold, P., Beljaars, A. C. M., van de  
528 Berg, L., Bidlot, J., Bormann, N., Delsol, C., Dragani, R., Fuentes, M., Geer, A. J., Healy  
529 S. B., Hersbach, H., Hólm, E. V., Isaksen, L., Kallberg, P., Kölher, M., Matricardi, M.,  
530 McNally, A. P., Morcrette, J. J., Park, B. K., Peubey, C., de Rosnay, P., Tavolato, C.,  
531 Thépaut, J. N. and Vitart, F.: The ERA-Interim reanalysis: Configuration and  
532 performance of the data assimilation system. *Q. J. Roy. Meteor. Soc.* 137(656): 553-597,  
533 2011.

534 DeJarnett, N., and Pittman, M.: Protecting the Health and Wellbeing of Communities in  
535 a Changing Climate. *Proceedings of a Workshop – in Brief*. The National Academies  
536 Press. 10.17226/24797, 8p, 2017.

537 De Ridder, K., Lauwaet, D., and Maiheu, B.: UrbClim–A fast urban boundary layer  
538 climate model. *Urban Clim.* 12: 21-48, 2015.

539 Dickson, E., Baker, J. L., and Hoornweg, D.: Urban risk assessments: understanding  
540 disaster and climate risk in cities. The World Bank Publications, 2012.

541 Diffenbaugh, N. S., Pal, J. S., Giorgi, F., and Gao, X.: Heat stress intensification in the  
542 Mediterranean climate change hotspot. *Geophysical Research Letters*, 34(11), 2007.

543 Drobinski, P., Ducrocq, V., Alpert, P., Anagnostou, E., Béranger, K., Borga, M., Braud,  
544 I., Chanzy, A., Davolio, S., Delrieu, G., Estournel, C., Filali Boubrahmi, N., Font, J.,  
545 Grubisic, V., Gualdi, S., Homar, V., Ivancan-Picek, B., Kottmeier, C., Kotroni, V.,  
546 Lagouvardos, K., Lionello, P., Llasat, M. C., Ludwig, W., Lutoff, C., Mariotti, A.,  
547 Richard, E., Romero, R., Rotunno, R., Roussot, O., Ruin, I., Somot, S., Taupier-Letage,  
548 I., Tintore, J., Uijlenhoet, R. and Wernli, H.: HyMeX, a 10-year multidisciplinary  
549 program on the Mediterranean water cycle, *B. Am. Meteorol. Soc.* 95(7): 1063-1082,  
550 2014.

551 Eum, J. H., Kim, K., Jung, E. H., and Rho, P.: Evaluation and Utilization of Thermal  
552 Environment Associated with Policy: A Case Study of Daegu Metropolitan City in South  
553 Korea. *Sustainability*. 10(4): 1179, 2018.

554 García Díez, M., Lauwaet, D., Hooyberghs, H., Ballester, J., De Ridder, K., and Rodó,  
555 X.: Advantages of using a fast urban boundary layer model as compared to a full  
556 mesoscale model to simulate the urban heat island of Barcelona. *Geosci. Model Dev.*  
557 9(12): 4439-4450, 2016.

558 Geletič, J., Lehnert, M., Dobrovolný, P.: Land Surface Temperature Differences within  
559 Local Climate Zones, Based on Two Central European Cities. *Remote Sens.* 8(10): 788,  
560 2016.

561 Geletič, J., Lehnert, M.: GIS-based delineation of local climate zones: The case of  
562 medium-sized Central European cities. *Morav. Geogr. Rep.* 24(3): 2-12, 2016.

563 Geletič, J., Lehnert, M., Savic, S., and Milošević, D.: Modelled spatiotemporal variability  
564 of outdoor thermal comfort in local climate zones of the city of Brno, Czech Republic.  
565 *Science of the Total Environment*, 624, 385–395, 2018.

566 Giannaros, T. M., Melas, D., Daglis, I. A., and Keramitsoglou, I.: Development of an  
567 operational modeling system for urban heat islands: an application to Athens, Greece.  
568 *Nat. Hazards Earth Syst. Sci.*, 14(2), 347, 2014.

569 Gilabert, J., Tardà, A., Llasat, M. C., and Corbera, J.: Assessment of Local Climate Zones  
570 over Metropolitan Area of Barcelona and added value of Urban Atlas, Corine Land Cover  
571 and Copernicus Layers under INSPIRE Specifications. INSPIRE Conference, Barcelona,  
572 2016.

573 Gilabert, J., and Llasat, M. C.: Circulation Weather Types associated with extreme flood  
574 events in Northwestern Mediterranean. *Int. J. Climatol.* 38(4): 1864-1876, 2017.

575 Hallegatte, S., Green, C., Nicholls, R. J. and Corfee-Morlot, J.: Future flood losses in  
576 major coastal cities. *Nat. Clim. Change* 3, 802–806, 2013.

577 Hammerberg, K., Brousse, O., Martilli, A., and Mahdavi A.: Implications of employing  
578 detailed urban canopy parameters for mesoscale climate modelling: a comparison  
579 between WUDAPT and GIS databases over Vienna, Austria. *Int. J. of Climatol.* 38: 1241-  
580 1257, 2018.

581 Hanson, S., Nicholls, R., Ranger, N., Hallegatte, S., Cofree-Morlot, J., Herweijer, C.,  
582 Chateau, J.: A global ranking of port cities with high exposure to climate extremes.  
583 *Climatic Change*, 104(1), 89-111, 2011.

584 Ingole, V., Mari-Dell’Olmo, M., Deluca, A., Quijal, M., Borrell, C., Rodríguez-Sanz, M.,  
585 Achebak, H., Lauwet, D., Gilabert, J., Murage, P., Hajat, S., Basagaña, X., and Ballester,  
586 J.: Spatial Variability of Heat-Related Mortality in Barcelona from 1992–2015: A Case  
587 Crossover Study Design. *Int. J. Environ. Res. Public Health.*17(7): 2553, 2020.

588 Inostroza, L., Palme, M., and de la Barrera, F.: A heat vulnerability index: spatial patterns  
589 of exposure, sensitivity and adaptive capacity for Santiago de Chile. *PloS one.* 11(9):  
590 e0162464, 2016.

591 Kotharkar, R., Bagade, A.: Local Climate Zone classification for Indian cities: A case  
592 study of Nagpur. *Urban clim.* 24: 369-392, 2018.

593 Krstic, N., Yuchi, W., Ho, H. C., Walker, B. B., Knudby, A. J., and Henderson, S. B.:  
594 The Heat Exposure Integrated Deprivation Index (HEIDI): A data-driven approach to  
595 quantifying neighborhood risk during extreme hot weather. *Environ. Int.* 109: 42-52,  
596 2017.

597 Kwok, Y. T., Schoetter, R., Lau, K. K. L., Hidalgo, J., Ren, C., Pigeon, G., and Masson,  
598 V.: How well does the local climate zone scheme discern the thermal environment of  
599 Toulouse (France)? An analysis using numerical simulation data. *International Journal of*  
600 *Climatology*, 39(14), 5292-5315, 2019.

601 Lehoczky, A., Sobrino, J. A., Skoković, D., and Aguilar, E.: The Urban Heat Island Effect  
602 in the City of Valencia: A Case Study for Hot Summer Days. *Urban Science*, 1(1), 9,  
603 2017.

604 Lelovics, E., Unger, J., and Gál, T.: Design of an urban monitoring network based on  
605 Local Climate Zone mapping and temperature pattern modelling. *Clim. Res.* 60: 51-62.

606 Li D, Bou-Zeid E. (2013) Synergistic interactions between urban heat islands and heat  
607 waves: the impact in cities is larger than the sum of its parts. *J. Appl. Meteorol.*  
608 *Clim.* 52(9): 2051-2064, 2014.

609 Li, X., Li, W., Middel, A., Harlan, S. L., Brazel, A. J., and Turner, B. L.: Remote sensing  
610 of the surface urban heat island and land architecture in Phoenix, Arizona: Combined  
611 effects of land composition and configuration and cadastral- demographic- economic  
612 factors. *Remote Sens. Environ.* 174: 233-243, 2016.

613 Lionello, P., Abrantes, F., Gacic, M., Planton, S., Trigo, R., and Ulbrich, U.: The climate  
614 of the Mediterranean region: research progress and climate change impacts. *Reg Environ*  
615 *Change* 14, 1679–1684., 2014.

616 Llasat, M. C., Llasat-Botija, M., López, L.: A press database on natural risks and its  
617 application in the study of floods in Northeastern Spain. *Nat. Hazard. Earth Sys.* 9(6):  
618 2049-2061, 2009.

619 Lo C. P., Quattrochi, D. A., and Luvall, J. C.: Application of high-resolution thermal  
620 infrared remote sensing and GIS to assess the urban heat island effect. *Int. J. Remote*  
621 *Sens.* 18(2): 287-304, 1997.

622 Martin-Vide, J., and Moreno-Garcia, M. C.: Probability values for the intensity of  
623 Barcelona's urban heat island (Spain). *Atmos. Res.*, 104877, 2020.

624 Masterton, J. M., and Richardson, F. A.: Humidex: a method of quantifying human  
625 discomfort due to excessive heat and humidity. Environment Canada. Atmospheric  
626 Environment, 1979.

627 MedECC.: Risks associated to climate and environmental changes in the Mediterranean  
628 region. A preliminary assessment by the MedECC Network. Science-policy interface –  
629 2019. 36 pp, 2019.

630 Mirzaei, P. A., Haghghat, F.: Approaches to study urban heat island–abilities and  
631 limitations. *Build. Environ.* 45(10): 2192-2201, 2010.

632 Mitraka, Z., del Frate, F., Chrysoulakis, N., and Gastellu-Etchegorry, J. P.: Exploiting  
633 earth observation data products for mapping local climate zones. Joint Urban Remote  
634 Sensing Event (JURSE). 1-4, 2015.

635 Nakamura, I., and Llasat, M. C.: Policy and systems of flood risk management: a  
636 comparative study between Japan and Spain. *Nat. Hazards.* 87(2): 919-943, 2017.

637 Nations, United.: World population prospects: The 2015 revision. United Nations Econ.  
638 Soc. Aff. 33(2): 1-66, 2015.

639 Nayak, S. G., Shrestha, S., Kinney, P. L., Ross, Z., Sheridan, S. C., Pantea, C. I., Hsu, W.  
640 H., Muscatiello, N., and Hwang, S. A.: Development of a heat vulnerability index for  
641 New York State. *Public health.* 161: 127-137, 2018.

642 Oke, T. R.: The energetic basis of the urban heat island. *Q. J. Roy. Meteor. Soc.* 108(455):  
643 1-24, 1982.

644 Pachauri, R. K., Allen, M. R., Barros, V. R., Broome, J., Cramer, W., Christ, R., Church  
645 J. A., Clarke, L., Dahe, Q., Dasgupta, P., Dubash, N. K., Edenhofer, O., Elgizouli, I.,  
646 Field, C. B., Forster, P., Friedlingstein, P., Fuglestvedt, J., Gomez-Echeverri, L.,  
647 Hallegatte, S., Hegerl, G., Howden, M., Jiang, K., Jimenez Cisneroz, B., Kattsov, K., Lee,  
648 H., Mach, K. J., Marotzke, J., Mastrandrea, M. D., Meyer, L., Minx, J., Mulugetta, Y.,  
649 O'Brien, Oppenheimer, M., Pereira, J. J., Pichs-Madruga, R., Plattner, G. K., Pörtner, H.  
650 O., Power, S. B., Preston, B., Ravindranath, N.H., Reisinger, A., Riahi, K., Rusticucci,  
651 M., Scholes, R., Seyboth, K., Sokona, Y., Stavins, R., Stocker, T. F., Tschakert, P., van

652 Vuuren, D., and van Ypserle, J.P.: Climate change 2014: synthesis report. Contribution  
653 of working groups I, II and III to the fifth assessment report of the intergovernmental  
654 panel on climate change. R. Pachauri, L. Meyer (Eds.), IPCC, Geneva, Switzerland.  
655 ISBN: 978-92-9169-143-2, 2014.

656 Rosenzweig, C., Solecki, W. D., Romero-Lankao, P., Mehrotra, S., Dhakal, S., and Ali  
657 Ibrahim, S.: Climate change and cities. Second assessment report of the urban climate  
658 change research network. New York: Cambridge University Press. Retrieved from:  
659 [http://www.cambridge.org/ws/academic/subjects/earth-and-environmental-](http://www.cambridge.org/ws/academic/subjects/earth-and-environmental-science/climatology-and-climate-change/climate-change-and-cities-second-assessment-report-urban-climate-change-research-network)  
660 [science/climatology-and-climate-change/climate-change-and-cities-second-assessment-](http://www.cambridge.org/ws/academic/subjects/earth-and-environmental-science/climatology-and-climate-change/climate-change-and-cities-second-assessment-report-urban-climate-change-research-network)  
661 [report-urban-climate-change-research-network](http://www.cambridge.org/ws/academic/subjects/earth-and-environmental-science/climatology-and-climate-change/climate-change-and-cities-second-assessment-report-urban-climate-change-research-network), 2018.

662 Sheridan, S. C., and Dixon, P. G.: Spatiotemporal trends in human vulnerability and  
663 adaptation to heat across the United States. *Anthropocene*. 20: 61-73, 2016.

664 Skarbit, N., Stewart, I. D., Unger, J., and Gál, T.: Employing an urban meteorological  
665 network to monitor air temperature conditions in the ‘local climate zones’ of Szeged,  
666 Hungary. *Int. J. Climatol.* 37: 582-596, 2017.

667 Skarbit, N., Gal, T., and Unger, J.: Airborne surface temperature differences of the  
668 different Local Climate Zones in the urban area of a medium sized city. Joint Urban  
669 Remote Sensing Event (JURSE). 1-4, 2015.

670 Smid, M., Russo, S., Costa, A. C., Granell, C., and Pebesma, E.: Ranking European  
671 capitals by exposure to heat waves and cold waves. *Urban Climate*, 27, 388-402, 2019.

672 Sobrino, J. A., and Irakulis, I.: A Methodology for Comparing the Surface Urban Heat  
673 Island in Selected Urban Agglomerations Around the World from Sentinel-3 SLSTR  
674 Data. *Remote Sensing*, 12(12), 2052, 2020.

675 Stewart, I. D.: A systematic review and scientific critique of methodology in modern  
676 urban heat island literature. *Int. J. Climatol.* 31(2): 200-217, 2011.

677 Stewart, I. D., and Oke, T. R.: Local climate zones for urban temperature studies. *B. Am.*  
678 *Meteorol. Soc.* 93(12): 1879-1900, 2012.

679 Stewart, I. D., Oke, T. R., and Krayenhoff, E. S.: Evaluation of the ‘local climate zone’  
680 scheme using temperature observations and model simulations. *Int. J. Climatol.* 34(4):  
681 1062-1080, 2014.

682 Tromeur, E., Ménard, R., Bailly, J. B., and Soulié, C.: Urban vulnerability and  
683 resilience within the context of climate change. *Nat. Hazards Earth Syst. Sci.*, 12(5),  
684 2012.

685 Unger, J., Skarbit, N. and Gál, T.: Evaluation of outdoor human thermal sensation of local  
686 climate zones based on long-term database. *International Journal of Biometeorology*,  
687 62(2), 183–193, 2018.

688 UNISDR, UNOFDRR.: Terminology on disaster risk reduction. Geneva, Switzerland,  
689 2009.

690 Verdonck, M. L., Demuzere, M., Hooyberghs, H., Beck, C., Cyrus, J., Schneider, A.,  
691 Dewulf, R., and Van Coillie, F.: The potential of local climate zones maps as a heat stress  
692 assessment tool, supported by simulated air temperature data. *Landscape Urban plan.*  
693 178: 183-197, 2018.

694 Voogt, J. A., and Oke, T. R.: Thermal remote sensing of urban climates *Remote Sens.*  
695 *Environ.* 86(3): 370-384, 2003.

696 Wang, R., Ren, C., Xu, Y., Lau, K. K. L., and Shi, Y.: Mapping the local climate zones  
697 of urban areas by GIS-based and WUDAPT methods: A case study of Hong Kong. *Urban*  
698 *Clim.* 24: 567- 576, 2017.

699 Weber, S., Sadoff, N., Zell, E., and de Sherbinin A.: Policy-relevant indicators for  
700 mapping the vulnerability of urban populations to extreme heat events: A case study of  
701 Philadelphia. *Appl. Geogr.* 63: 231-243, 2015, 2015.

702 Wolf, T., and McGregor G.: The development of a heat wave vulnerability index for  
703 London, United Kingdom. *Weather and Climate Extremes.* 1: 59-68, 2013

704 Xu, Z., Sheffield, P. E., Hu, W., Su, H., Yu, W., Qi, X., and Tong S.: Climate change and  
705 children’s health- A call for research on what works to protect children. *I Int. J. Environ.*  
706 *Res. Public Health.* 9(9): 3298-3316, 2012.



707

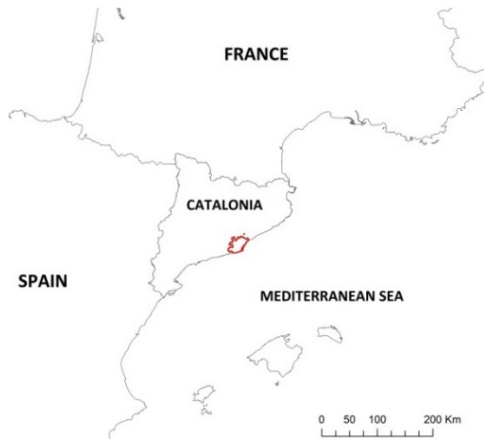

708

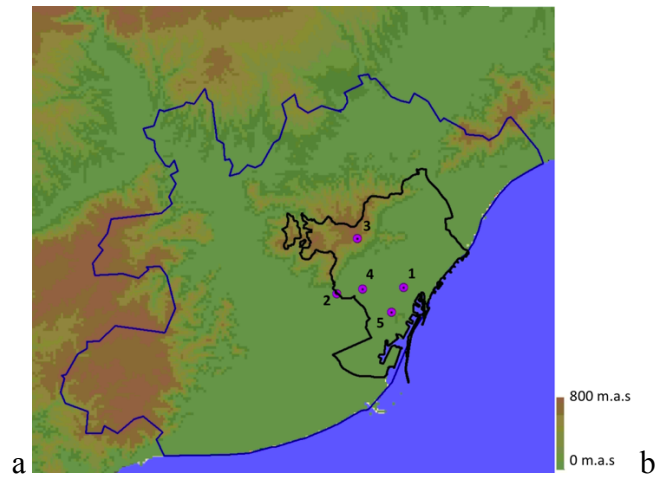

709

**Figure 1. a) Location of the Metropolitan Area of Barcelona (AMB), b) Domain used to run the**  
**UrbClim model. The blue line marks the border of the AMB, while the black line shows the**  
**municipality of Barcelona. The numbers indicate the weather stations used to assess the LCZ-T**  
**relationship.**

713

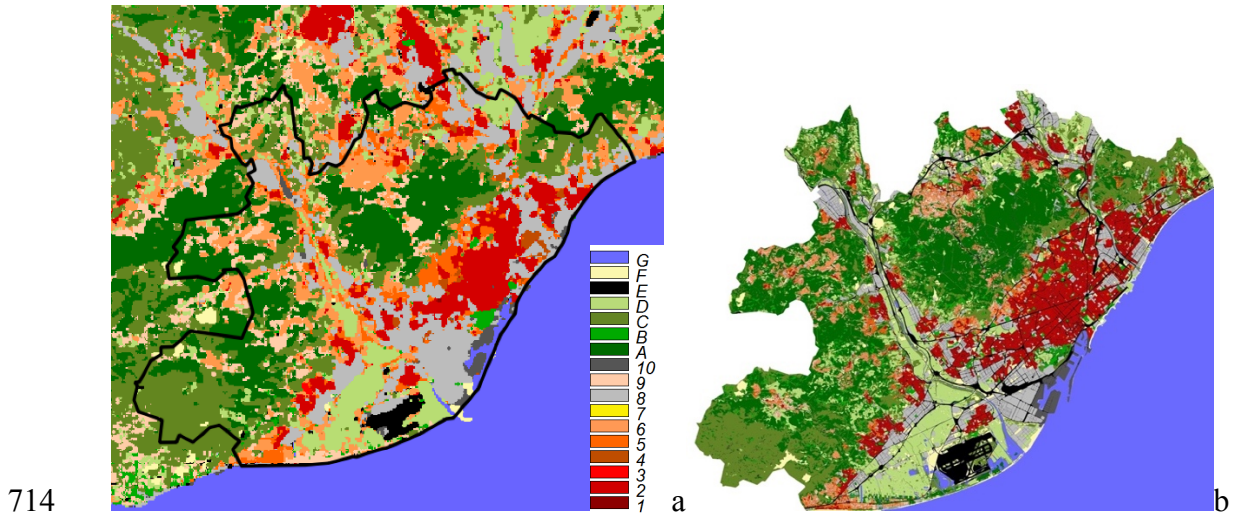

Figure 2. LCZ maps: a) WUDAPT method, b) LCLU method.

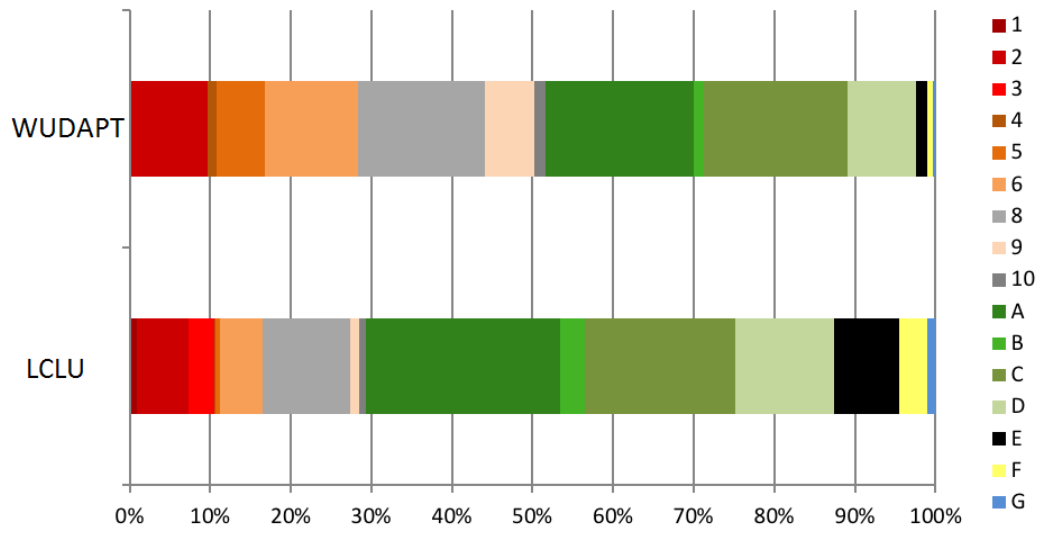

717

718 **Figure 3. Percentage of the area covered by each LCZ using WUDAPT and LCLU inside AMB.**

719

720

721

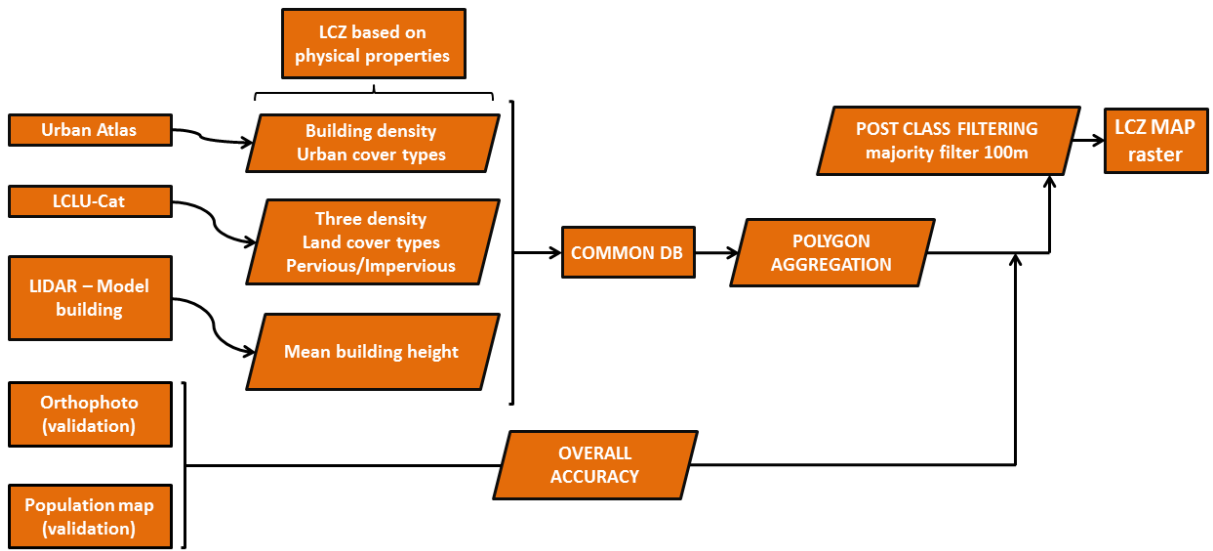

722

723

**Figure 4. Workflow used to obtain the LCZ LCLU model.**

724

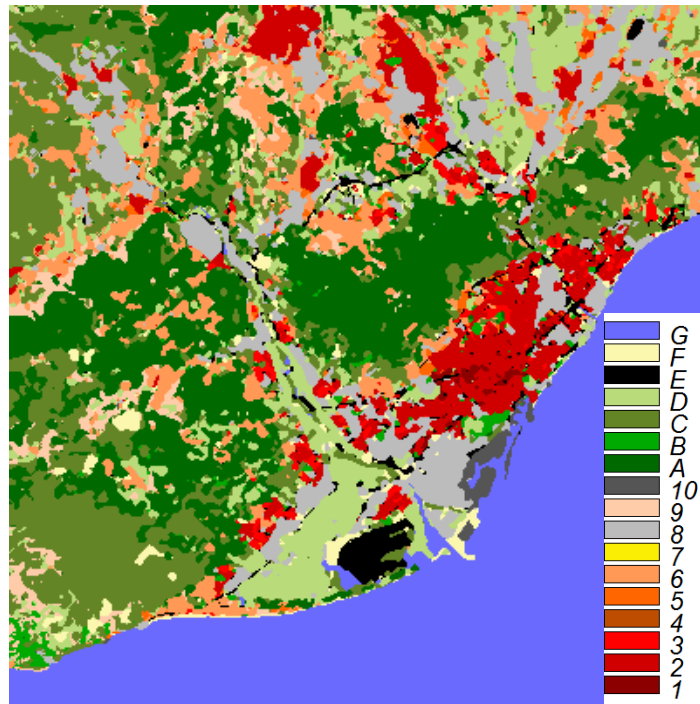

725

726

Figure 5. LCZ used in the UrbClim model based on workflow showed in Fig. 4.

727

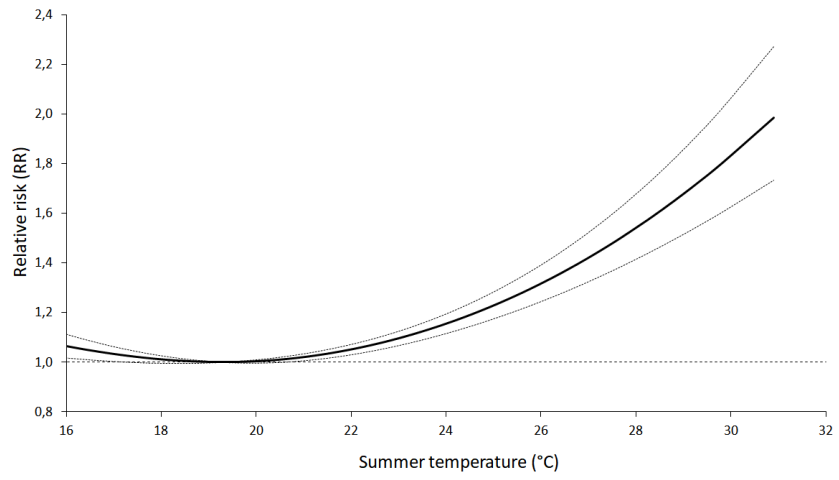

728

729 **Figure 6. Relative risk (RR) curve based on mortality due to summer daily temperature (JJA) in**  
730 **Barcelona for the 1980 - 2015 period (Achebak et al., 2018).**

731

732

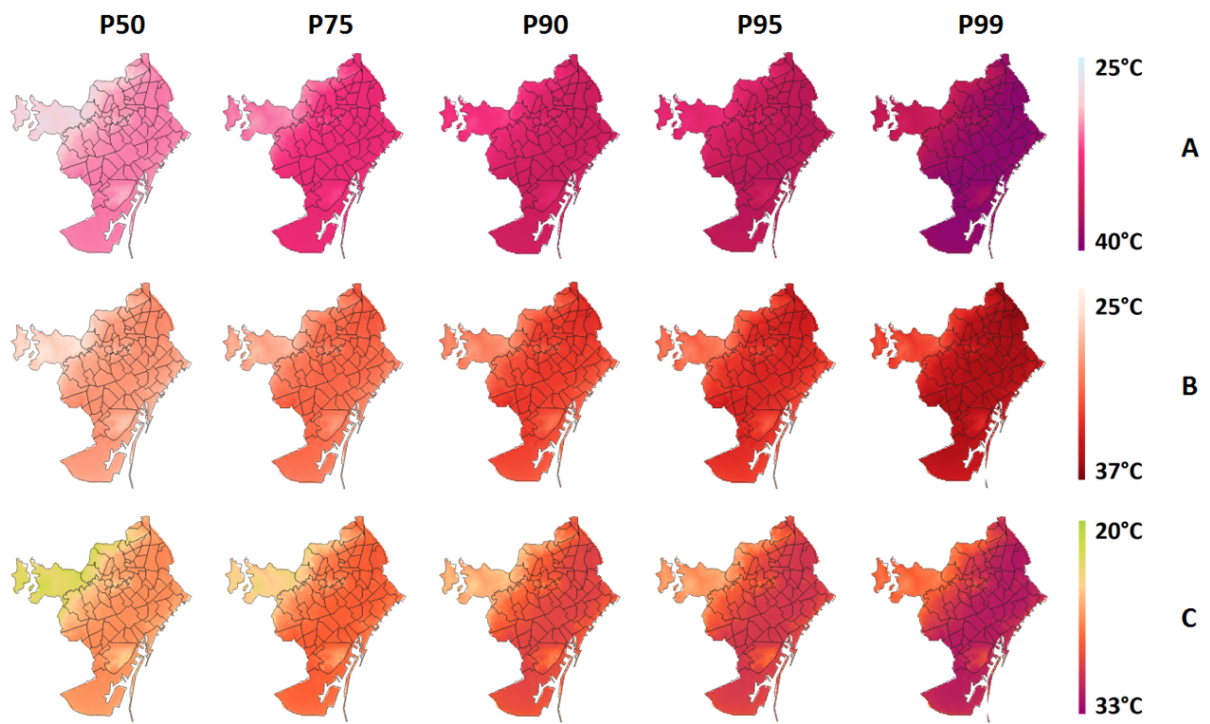

733

734 **Figure 7. Climatological conditions in summer modelled by UrbClim (1987 - 2016): A) HUMIDEX,**  
 735 **B) Daily maximum temperature, C) Daily mean temperature, for the different distributions (P 50, P**  
 736 **75, P 90, P 95 and P 99).**

737

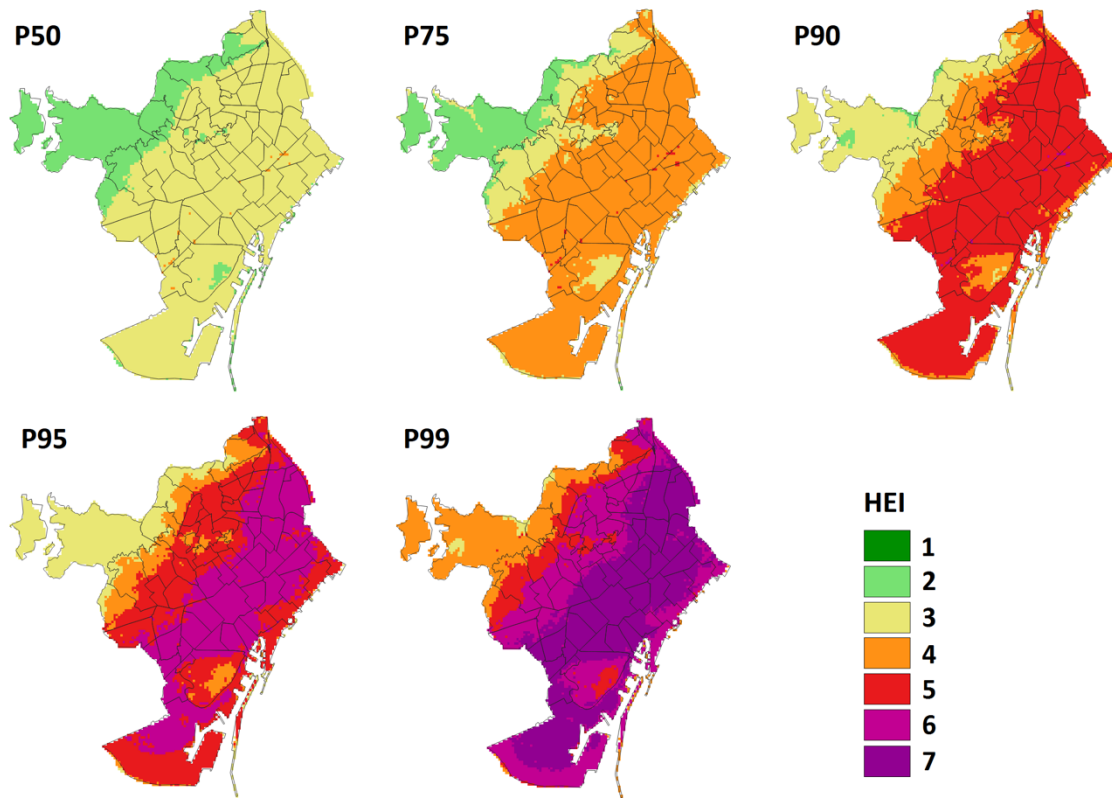

738

739 **Figure 8. Maps of HEI for the different probability distributions proposed (P 50, P 75, P 90, P 95**  
 740 **and P 99).**

741



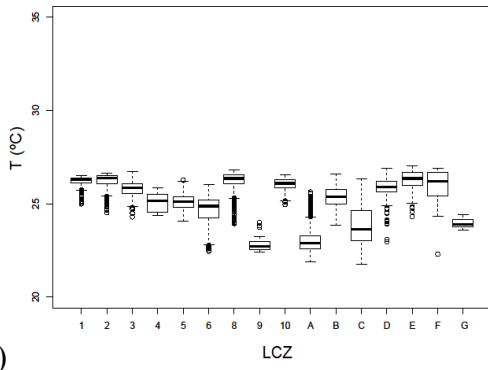

742

a)

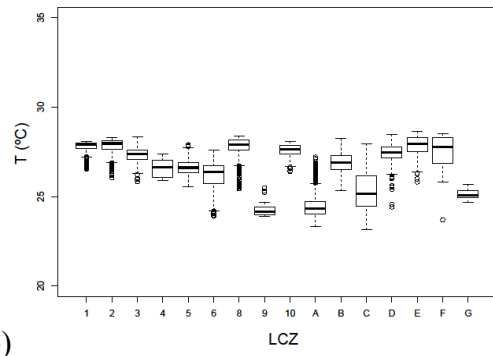

b)

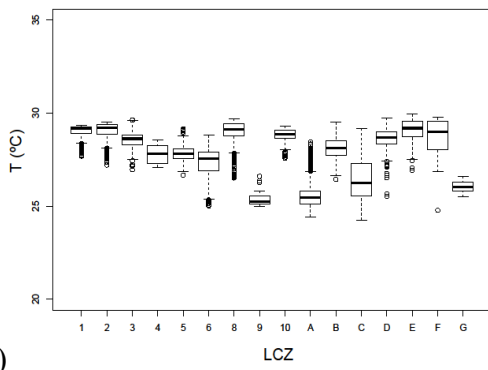

743

c)

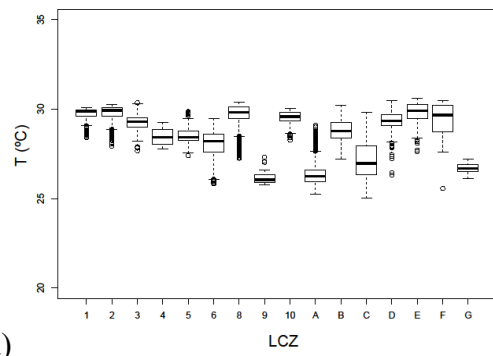

d)

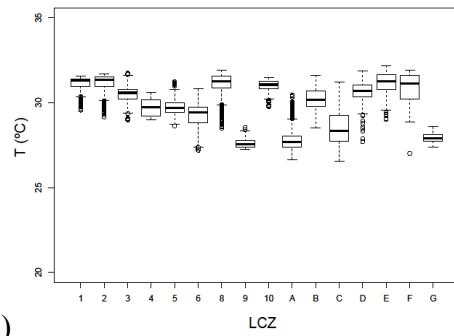

744

e)

745 **Figure 9. Box plots for the thermal characterisation of the LCZ for different distributions: a) P 50,**  
 746 **b) P 75, c) P 90, d) P 95 and e) P 99. (See S1 for LCZ features)**

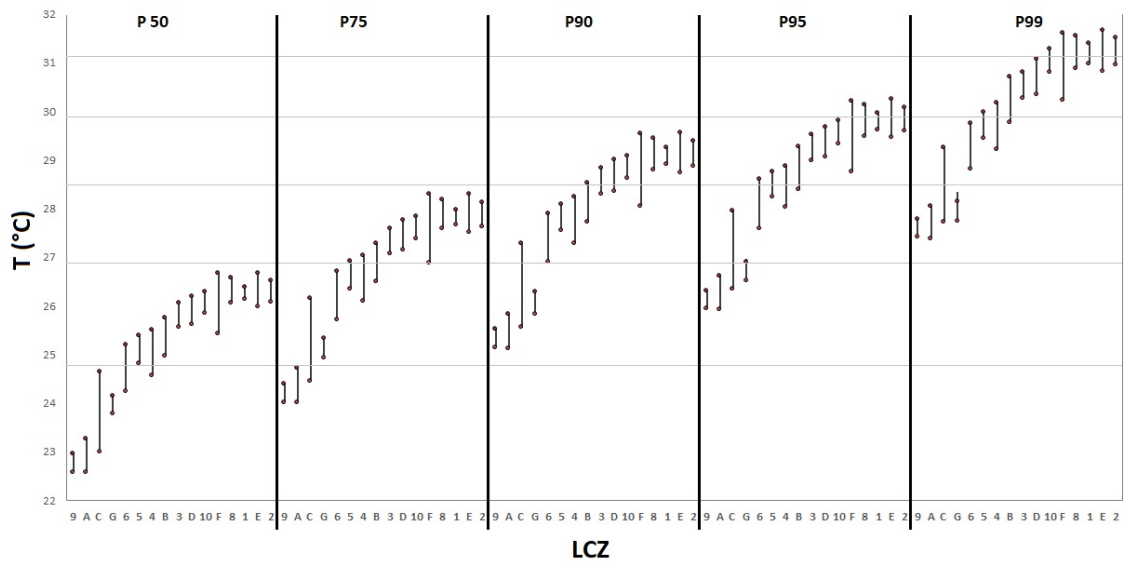

747

748 **Figure 10. Characterisation of every LCZ with the daily mean temperature (1987 - 2016) for each**  
 749 **probability scenario. Each bar shows P 25 and P 75, around the median for each LCZ (ordered**  
 750 **from lowest to highest temperature). The grey horizontal lines are the different HEI scenarios (2 to**  
 751 **7, lower to high).**

752

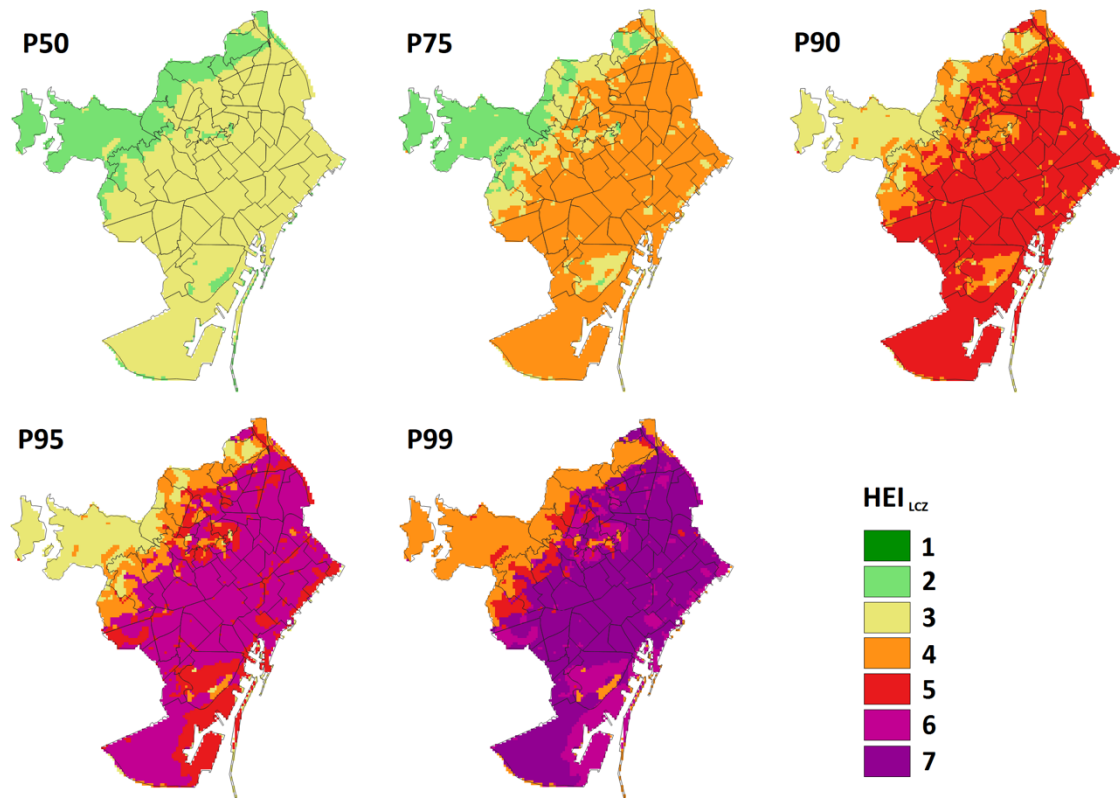

753

754 **Figure 11. Cartography of the heat exposure (HEI) in basis to thermal characterization of**  
 755 **Barcelona by LCZs for different percentiles (LCZ - T) as shown in Table 3.**

756

757

| <b>Layer</b>     | <b>Information</b>            | <b>Spatial Resolution</b> | <b>Year</b> | <b>Format</b>      |
|------------------|-------------------------------|---------------------------|-------------|--------------------|
| Urban Atlas      | 20 categories of urban fabric | 5 m                       | 2010        | Vector cartography |
| LCLU-Cat         | 241 categories                | 0.25 m                    | 2010        | Vector cartography |
| Building Heights | Height (m) (LIDAR)            | 0.5 m                     | 2014        | Vector cartography |
| Orthophoto       | Mosaic of aerial photos       | 0.25 m                    | 2016        | Raster cartography |
| Population       | Population by ages            | 62.5, 125, 250 m          | 2016        | Vector cartography |
| LANDSAT 8        | 05/03/2015                    | 30m                       | 2015        | Raster satellite   |

758 **Table 1. Vector and raster cartographic data and satellite images used to map the LCZ - LCLU and**  
759 **LCZ - WUDAPT methods.**

760

761

762

| <b>ID</b> | <b>Weather Stations</b> | <b>Series</b> | <b>Years</b> | <b>LCZ</b> | <b>Z (m.a.s)</b> | <b>Variable</b> |
|-----------|-------------------------|---------------|--------------|------------|------------------|-----------------|
| 1         | Raval                   | 1997-2016     | 19           | 2          | 33               | T daily         |
| 2         | Zona Universitària      | 1997-2016     | 19           | C          | 79               | T daily         |
| 3         | Fabra                   | 1987-2016     | 29           | A          | 411              | T daily         |
| 4         | Can Bruixa              | 1987-2015     | 28           | 2          | 61               | T daily         |
| 5         | Montjuïc                | 2004-2015     | 11           | B          | 90               | T daily         |

763 **Table 2. Weather stations in Barcelona used to assess the LCZ - T relationship based on daily mean**  
764 **temperatures.**

765

766

767

768

769

770

771

| RR   | HEI | °C         |
|------|-----|------------|
| 1.0  | 1   | 18 -20     |
| 1.2  | 2   | 20 -24.7   |
| 1.4  | 3   | 24.7 -26.9 |
| 1.6  | 4   | 26.9 -28.5 |
| 1.8  | 5   | 28.5 -29.8 |
| 2.0  | 6   | 29.8 -31.1 |
| >2.0 | 7   | >31.1      |

772

**Table 3. Temperature thresholds associated to heat exposure caused by high temperatures in basis**

773

**to figure 5. Heat Exposure Index (HEI) is assigned to each temperature range.**

774

| <b>LCZ</b> | <b>P 50</b> | <b>P 75</b> | <b>P 90</b> | <b>P 95</b> | <b>P 99</b> |
|------------|-------------|-------------|-------------|-------------|-------------|
| <b>1</b>   | 0.301       | 0.325       | 0.349       | 0.363       | 0.419       |
| <b>2</b>   | 0.356       | 0.379       | 0.396       | 0.401       | 0.475       |
| <b>3</b>   | 0.450       | 0.468       | 0.486       | 0.489       | 0.552       |
| <b>4</b>   | 0.528       | 0.530       | 0.535       | 0.522       | 0.569       |
| <b>5</b>   | 0.467       | 0.488       | 0.504       | 0.500       | 0.541       |
| <b>6</b>   | 0.821       | 0.841       | 0.872       | 0.843       | 0.804       |
| <b>8</b>   | 0.465       | 0.499       | 0.527       | 0.531       | 0.580       |
| <b>9</b>   | 0.456       | 0.474       | 0.461       | 0.441       | 0.379       |
| <b>10</b>  | 0.319       | 0.338       | 0.339       | 0.338       | 0.322       |
| <b>A</b>   | 0.686       | 0.712       | 0.725       | 0.705       | 0.649       |
| <b>B</b>   | 0.554       | 0.580       | 0.603       | 0.616       | 0.641       |
| <b>C</b>   | 1.090       | 1.128       | 1.168       | 1.128       | 1.088       |
| <b>D</b>   | 0.550       | 0.572       | 0.596       | 0.586       | 0.612       |
| <b>E</b>   | 0.530       | 0.561       | 0.599       | 0.595       | 0.678       |
| <b>F</b>   | 0.848       | 0.918       | 0.960       | 0.955       | 0.978       |
| <b>G</b>   | 0.224       | 0.265       | 0.297       | 0.294       | 0.289       |

775

**Table 4. Standard deviations for the LCZs for the different percentiles of temperature.**

776

|                     | DIST | OB   | UC   | LCZ-T | $\Delta$ OB-UC | $\Delta$ OB-LCZ-T |
|---------------------|------|------|------|-------|----------------|-------------------|
| 1-Raval (LCZ 2)     | P50  | 25.6 | 26.1 | 26.1  | 0.5            | 0.5               |
|                     | P75  | 26.8 | 27.6 | 27.6  | 0.8            | 0.8               |
|                     | P90  | 27.8 | 28.9 | 28.9  | 1.1            | 1.1               |
|                     | P95  | 28.5 | 29.6 | 29.6  | 1.1            | 1.1               |
|                     | P99  | 30.2 | 31.1 | 30.9  | 0.9            | 0.7               |
| 2-ZU (LCZ C)        | P50  | 24.5 | 24.7 | 24.6  | 0.2            | 0.1               |
|                     | P75  | 25.8 | 26.2 | 26.2  | 0.4            | 0.4               |
|                     | P90  | 26.6 | 27.3 | 27.3  | 0.7            | 0.7               |
|                     | P95  | 27.2 | 28.1 | 27.9  | 0.9            | 0.7               |
|                     | P99  | 28.5 | 29.5 | 29.2  | 1              | 0.7               |
| 3-Fabra (LCZ A)     | P50  | 23.1 | 23.1 | 22.9  | 0              | -0.2              |
|                     | P75  | 24.6 | 24.7 | 24.3  | 0.1            | -0.3              |
|                     | P90  | 25.9 | 25.8 | 25.5  | -0.1           | -0.4              |
|                     | P95  | 26.5 | 26.6 | 26.2  | 0.1            | -0.3              |
|                     | P99  | 27.3 | 27.5 | 27.7  | 0.2            | 0.4               |
| 4-C. Bruixa (LCZ B) | P50  | 25.2 | 26.1 | 25.4  | 0.9            | 0.2               |
|                     | P75  | 26.8 | 27.6 | 26.9  | 0.8            | 0.1               |
|                     | P90  | 27.9 | 28.9 | 28.1  | 1              | 0.2               |
|                     | P95  | 28.6 | 29.6 | 28.8  | 1              | 0.2               |
|                     | P99  | 30   | 30.9 | 30.2  | 0.9            | 0.2               |
| 5-Monjuïc (LCZ B)   | P50  | 24.8 | 25.2 | 25.0  | 0.4            | 0.2               |
|                     | P75  | 26.3 | 26.8 | 26.5  | 0.5            | 0.2               |
|                     | P90  | 27.3 | 28   | 27.7  | 0.7            | 0.4               |
|                     | P95  | 27.8 | 28.6 | 28.4  | 0.8            | 0.6               |
|                     | P99  | 29.1 | 30.1 | 29.8  | 1              | 0.7               |

778 **Table 5. Temperature for each distribution/scenario (DIST) and weather station observed (OB),**  
779 **modelled by UrbClim (UC) and estimated from the distribution of temperature (the mean value is**  
780 **taken) for each LCZ (LCZ-T). The difference ( $\Delta$ ) between them is also showed. All the values are**  
781 **expressed in ° C.**



| <b>MODEL</b>         | <b>P50</b> | <b>P75</b> | <b>P90</b> | <b>P95</b> | <b>P99</b> |
|----------------------|------------|------------|------------|------------|------------|
| <b>Underestimate</b> | 284        | 671        | 1711       | 2789       | 2289       |
| <b>Good</b>          | 9687       | 8762       | 8175       | 6316       | 6823       |
| <b>Overestimate</b>  | 247        | 785        | 332        | 1103       | 1106       |
| <b>% correct</b>     | 95         | 86         | 80         | 62         | 67         |
| <b>RMSE</b>          | 0.23       | 0.38       | 0.45       | 0.62       | 0.58       |

783 **Table 6. Number of pixels where the HEI obtained through the LCZ-T model (Figure 11)**  
784 **underestimate, overestimate or coincide with the HEI provided by the Urban Climate Model**  
785 **(Figure 6) for the different scenarios. Percentage of coincidences and RMSE are also showed.**

786

787
